# Supplementary material for: Self-assembly of amphiphilic truncated cones to form hollow nanovesicles
Source: Royal Society of Chemistry journal article supplement (doi:10.1039/c8ra01100a), 2018-01-01
Supplement: c8ra01100a1.pdf [file c8ra01100a1.pdf]

## Self-assembly of amphiphilic truncated cones to form hollow nanovesicles

Yali Wang<sup>1</sup> and Xuehao He<sup>1,2,3\*</sup>

<sup>1</sup>Department of Chemistry, School of science, Tianjin University, Tianjin 300350, China

<sup>2</sup>National Demonstration Center for Experimental Chemistry & Chemical engineering Education, Tianjin University, Tianjin 300350, China

<sup>3</sup>National Virtual Simulation Experimental Teaching Center for Chemistry & Chemical engineering Education, Tianjin University, Tianjin 300350, China

Table S1. The number of *A* and *B* beads of each kind of particles and the annealing temperature range of each system with corresponding particle shape in this work.

| shape                                                                               | $\theta$ (°) | $h_c$ | $A_xB_y$        | Annealing temperature range | shape                                                                               | $\theta$ (°) | $h_c$ | $B_xA_yB_z$           | Annealing temperature range |
|-------------------------------------------------------------------------------------|--------------|-------|-----------------|-----------------------------|-------------------------------------------------------------------------------------|--------------|-------|-----------------------|-----------------------------|
|    | 25           | 0.0   | $A_{97}B_{26}$  | 270~204K                    |                                                                                     |              |       |                       |                             |
|    | 25           | 0.2   | $A_{94}B_{26}$  | 255~198K                    |    | 25           | 0.2   | $B_3A_{91}B_{26}$     | 225~181K                    |
|    | 25           | 0.4   | $A_{85}B_{26}$  | 220~166K                    |    | 25           | 0.4   | $B_7A_{78}B_{26}$     | 180~100K                    |
|  | 25           | 0.5   | $A_{78}B_{26}$  | 220~137K                    |  | 25           | 0.6   | $B_{12}A_{56}B_{26}$  | 100~40K                     |
|  | 25           | 0.6   | $A_{68}B_{26}$  | 190~110K                    |  | 25           | 0.7   | $B_{16}A_{40}B_{26}$  | 71~1K                       |
|  | 30           | 0.0   | $A_{130}B_{36}$ | 300~240K                    |                                                                                     |              |       |                       |                             |
|  | 30           | 0.2   | $A_{127}B_{36}$ | 290~240K                    |  | 30           | 0.2   | $B_5A_{122}B_{36}$    | 250~200K                    |
|  | 30           | 0.4   | $A_{115}B_{36}$ | 260~140K                    |  | 30           | 0.4   | $B_{10}A_{105}B_{36}$ | 185~115K                    |
|  | 30           | 0.5   | $A_{105}B_{36}$ | 250~150K                    |  | 30           | 0.5   | $B_{12}A_{93}B_{36}$  | 180~100K                    |
|  | 30           | 0.6   | $A_{93}B_{36}$  | 230~100K                    |  | 30           | 0.6   | $B_{18}A_{75}B_{36}$  | 110~40K                     |
|  | 35           | 0.0   | $A_{158}B_{47}$ | 300~220K                    |                                                                                     |              |       |                       |                             |
|  | 35           | 0.2   | $A_{155}B_{47}$ | 290~200K                    |  | 35           | 0.2   | $B_5A_{150}B_{47}$    | 245~175K                    |
|  | 35           | 0.4   | $A_{143}B_{47}$ | 270~170K                    |  | 35           | 0.4   | $B_{11}A_{132}B_{47}$ | 200~100K                    |
|  | 35           | 0.5   | $A_{132}B_{47}$ | 260~148K                    |  | 35           | 0.6   | $B_{19}A_{97}B_{47}$  | 130~30K                     |
|  | 35           | 0.6   | $A_{116}B_{47}$ | 230~110K                    |  | 35           | 0.7   | $B_{26}A_{71}B_{47}$  | 71~1K                       |

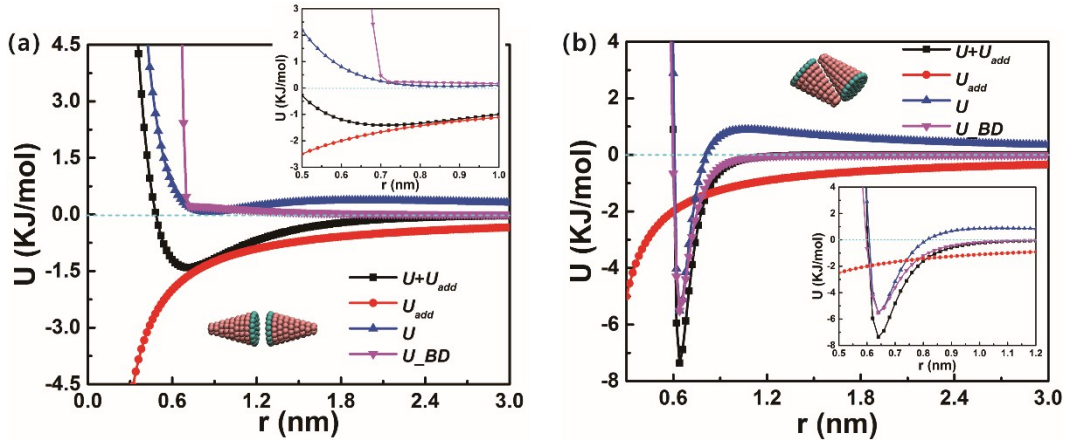

**Fig. S1** The calculation of potential energy of two interacting  $A_x B_y$  particles at  $\theta = 30^\circ$  and  $h_c = 0.2$ . The orientation angles in (a) and (b) are  $(99, 0, 44)$  and  $(23, 76, 90)$ , respectively.

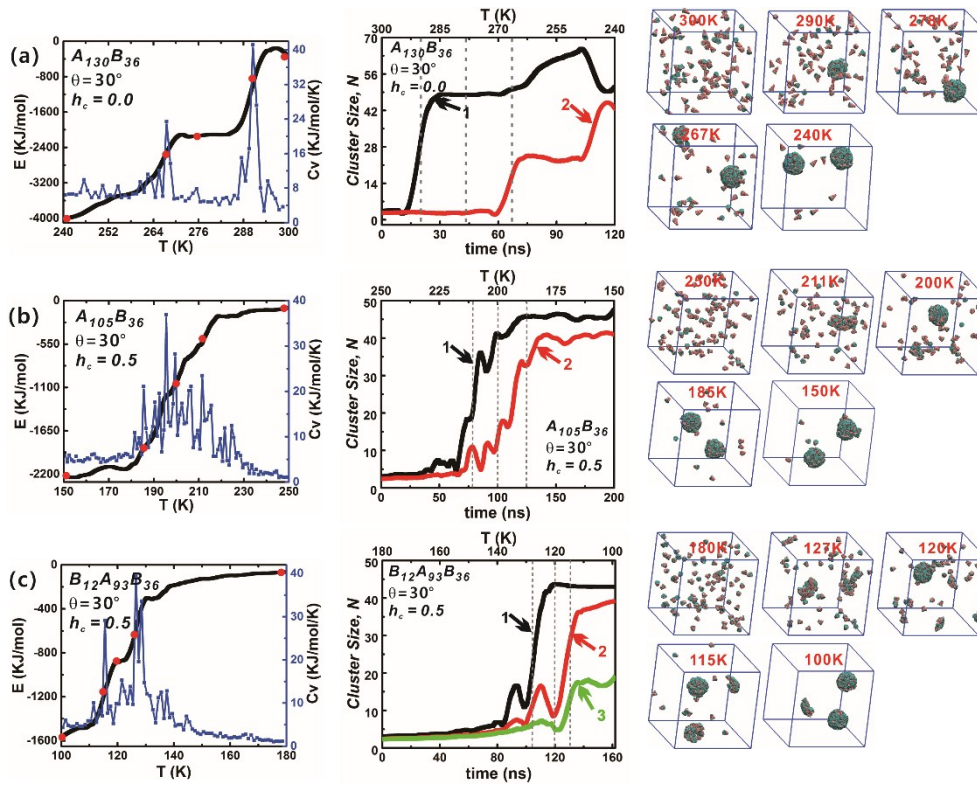

**Fig. S2** The energy  $E$ , specific capacity heat  $C_v$  and cluster growth kinetics of  $A_x B_y$  and  $B_x A_y B_z$  type particles at  $\theta = 30^\circ$  and  $h_c = 0.0, 0.5$ . The snapshots of self-assembled intermediate configurations at several typical temperatures (indicated by red points on energy evolution curves) are also shown. The specific capacity heat  $C_v$  reflects the system energy fluctuation in the self-assembly process. The dash lines on cluster growth kinetics correspond to those red temperature points on energy evolution curves. The final assembled structures mainly include two complete clusters, and the black, red and green curves correspond to the growth of the first, second and third cluster, respectively.

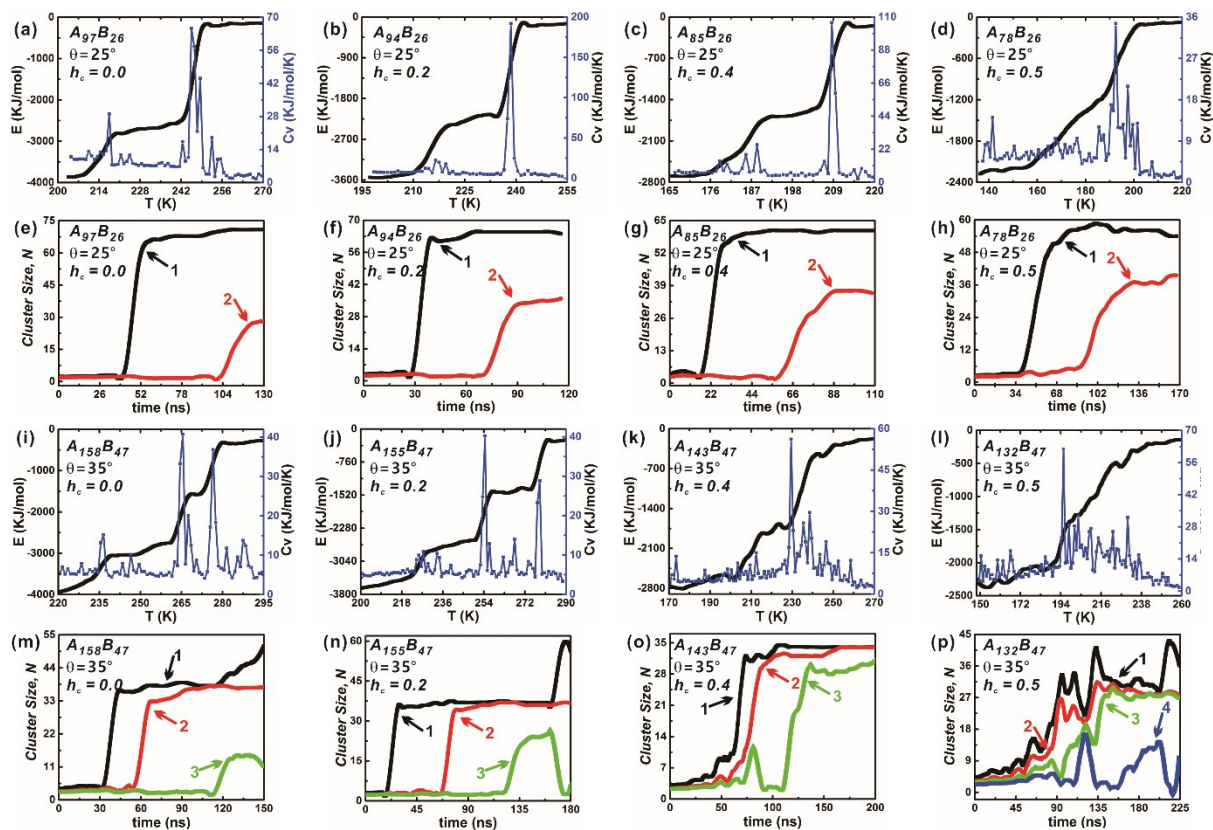

**Fig. S3** Energy evolution and growth kinetics of the self-assembly of  $A_x B_y$  type particles at  $\theta = 25^\circ$  and  $35^\circ$ . Except for  $h_c = 0.5$ , the energy evolutions of  $A_x B_y$  type particles at  $h_c = 0.0, 0.2, 0.4$  are like ladders. The clusters are formed gradually with one-by-one way. At  $\theta = 35^\circ$  and  $h_c = 0.5$ , clusters are likely to generated together, and the cluster size fluctuates rather noticeably in the assembly. The black, red, green and blue curves in (e-h) and (m-p) correspond to the growth of the first, second, third and fourth cluster, respectively.

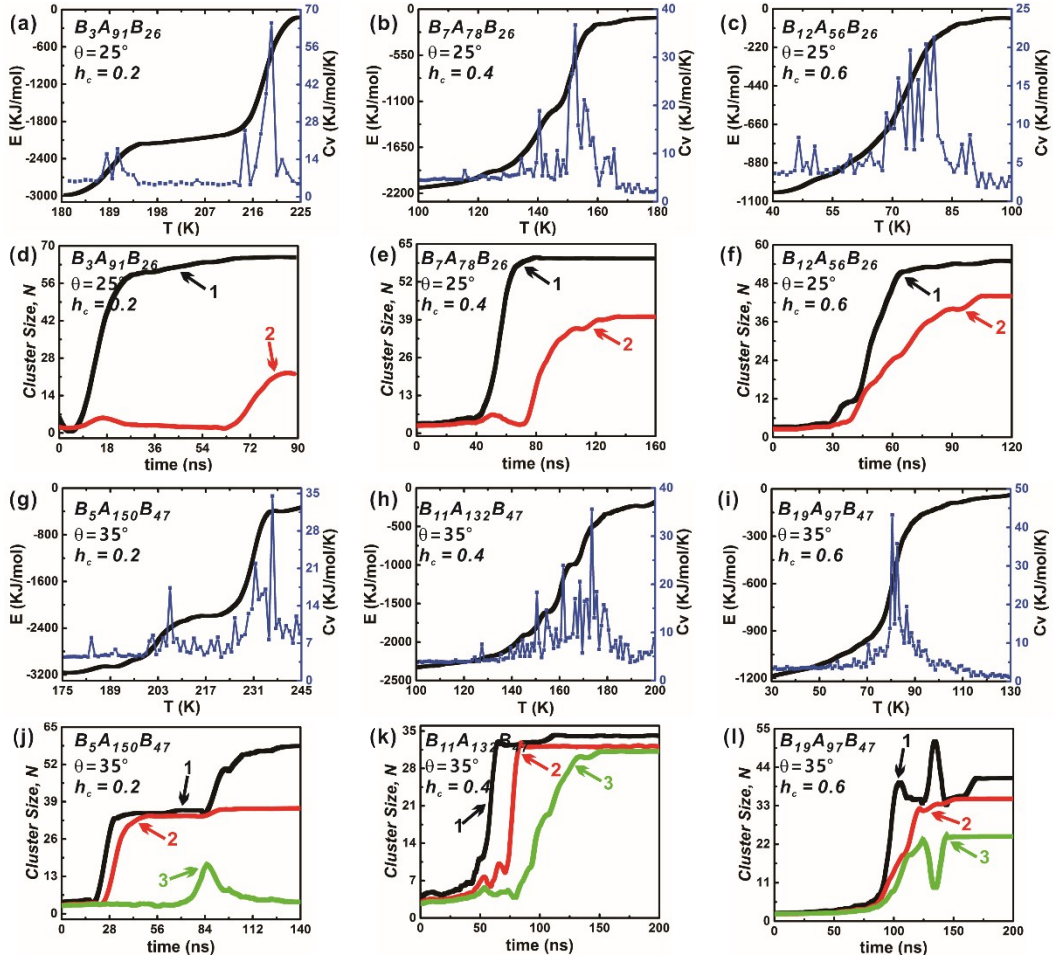

**Fig. S4** Energy evolution and growth kinetics of clusters of  $B_x A_y B_z$  type particles at  $\theta = 25^\circ$  and  $35^\circ$ . Energy decreases quickly with increasing  $h_c$ . At  $h_c = 0.5$ , several clusters begin to form simultaneously. In the case of  $h_c = 0.2, 0.4$ , clusters are formed one after another. The sharp cluster size change is due to the merger of the partial structures and complete cluster. The black, red and green curves correspond to the first, second and third cluster, respectively.

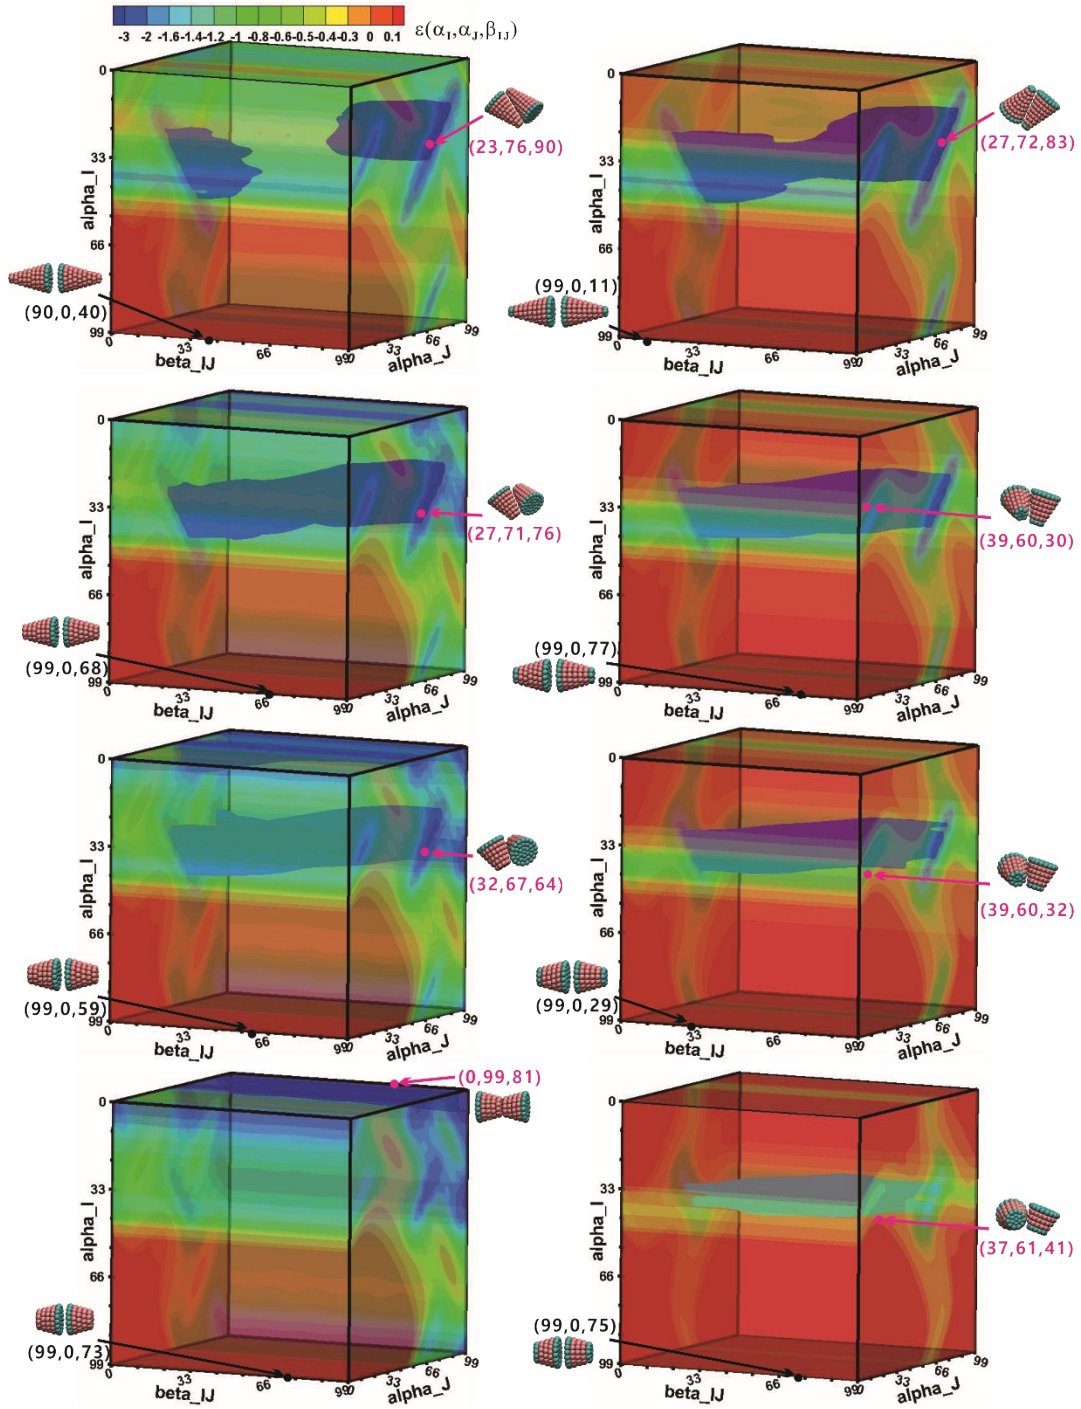

**Fig. S5** The potential energy surface (PES) of two interacting  $A_x B_y$  and  $B_x A_y B_z$  type particles. The left column is for  $A_x B_y$  particles at  $\theta = 30^\circ$  and  $h_c = 0.2, 0.4, 0.5, 0.6$ . The right column is for  $B_x A_y B_z$  particles at  $\theta = 30^\circ$  and  $h_c = 0.2, 0.4, 0.5, 0.6$ . The unit of three orientation angle is  $\pi/99$ . The displayed color legend is also applied in all PESs. Pink and black points represent minimum and maximum energies on PES, respectively, and their corresponding configurations are shown.

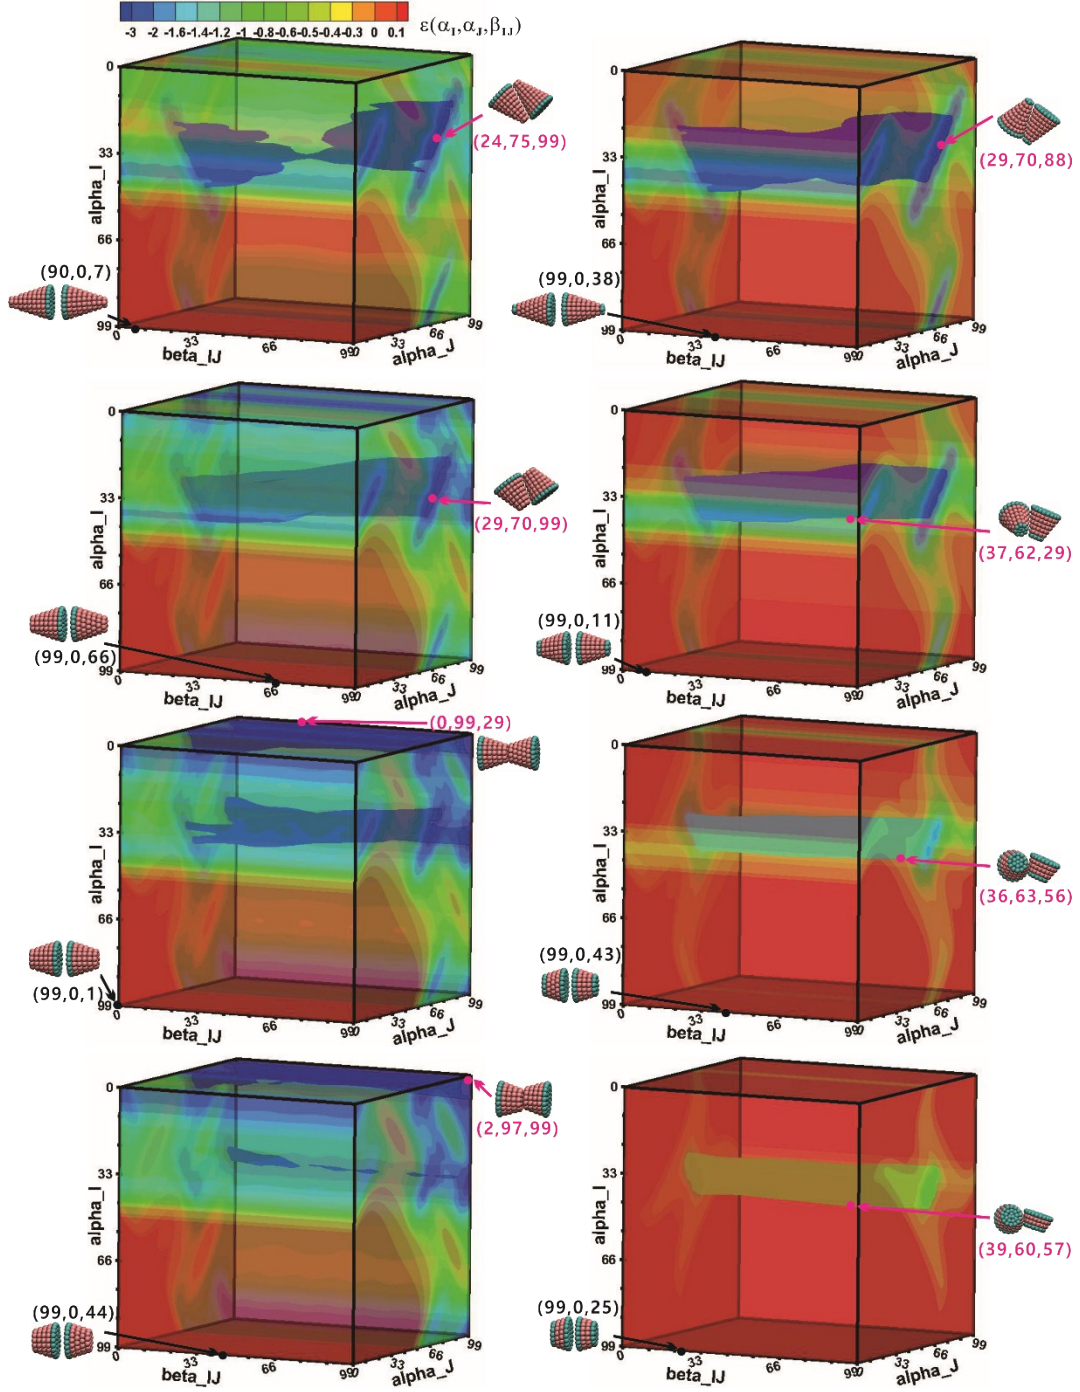

**Fig. S6** The potential energy surface (PES) of two interacting  $A_x B_y$  and  $B_x A_y B_z$  type particles. The left column is for  $A_x B_y$  particles at  $\theta = 35^\circ$  and  $h_c = 0.2, 0.4, 0.5, 0.6$ . The right column is for  $B_x A_y B_z$  particles at  $\theta = 35^\circ$  and  $h_c = 0.2, 0.4, 0.6, 0.7$ . The unit of three orientation angle is  $\pi/99$ . The displayed color legend is also applied in all PESs. Pink and black points represent minimum and maximum energies on PES, respectively, and their corresponding configurations are shown.
